# Supplementary material for: Necklace-like carbon nanofibers encapsulating V3S4 microspheres for ultrafast and stable potassium-ion storage
Source: Royal Society of Chemistry journal article supplement (doi:10.1039/c9ta12859j), 2020-01-01
Supplement: c9ta12859j1.pdf [file c9ta12859j1.pdf]

## Supporting Information

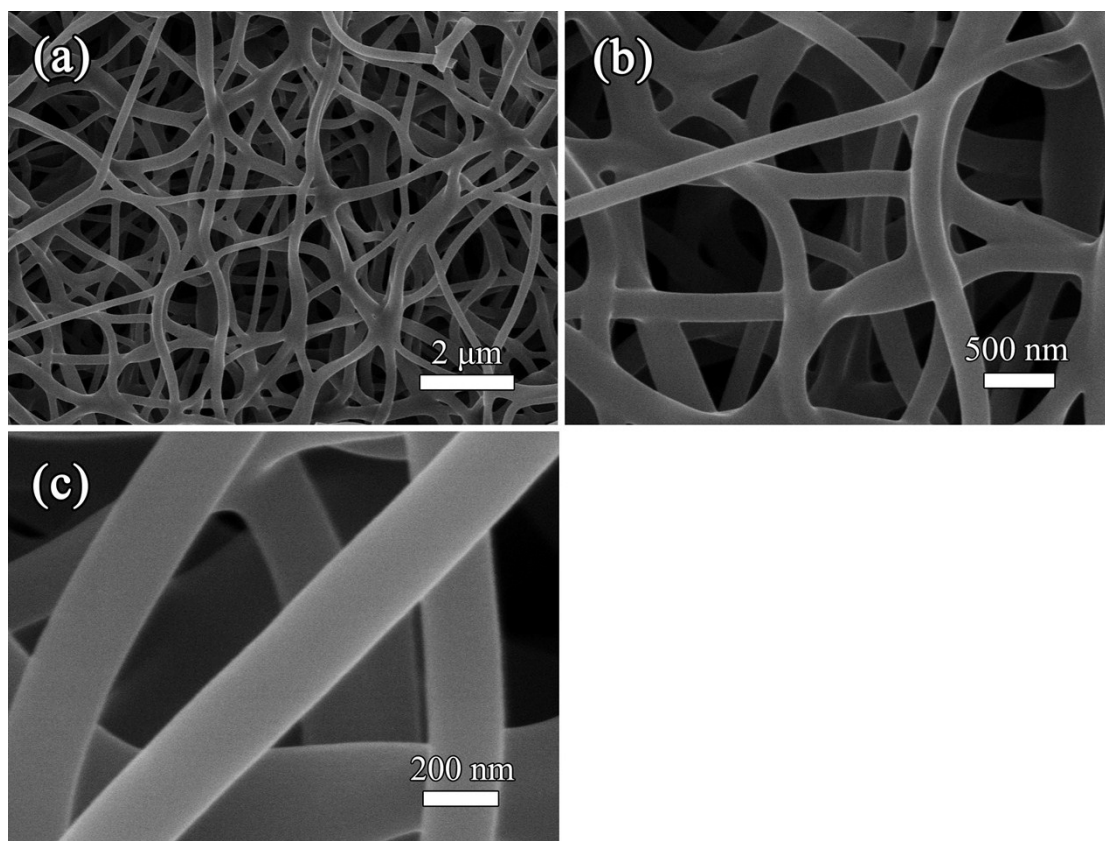

**Fig. S1.** (a-c) SEM image of N-doped carbon nanofibers (NCNFs)

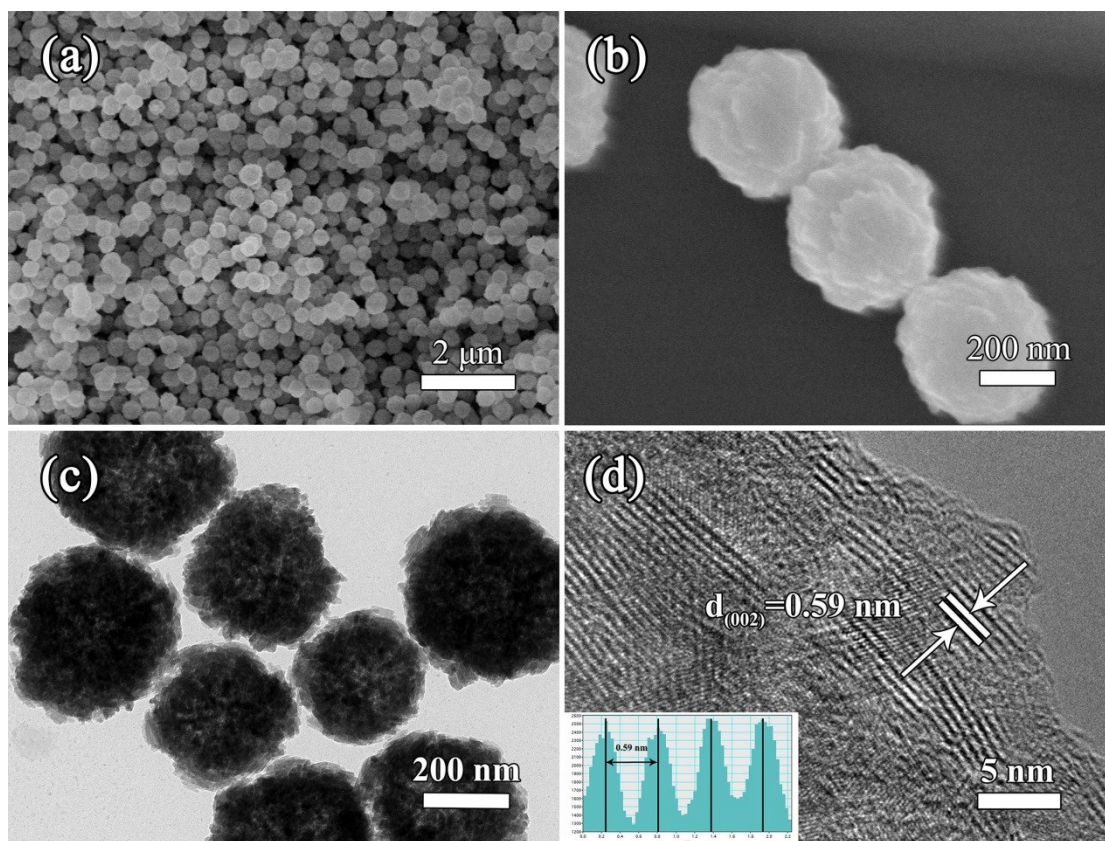

**Fig. S2.** (a, b) SEM images and (c,d) TEM images of  $\text{VS}_4$  microspheres.

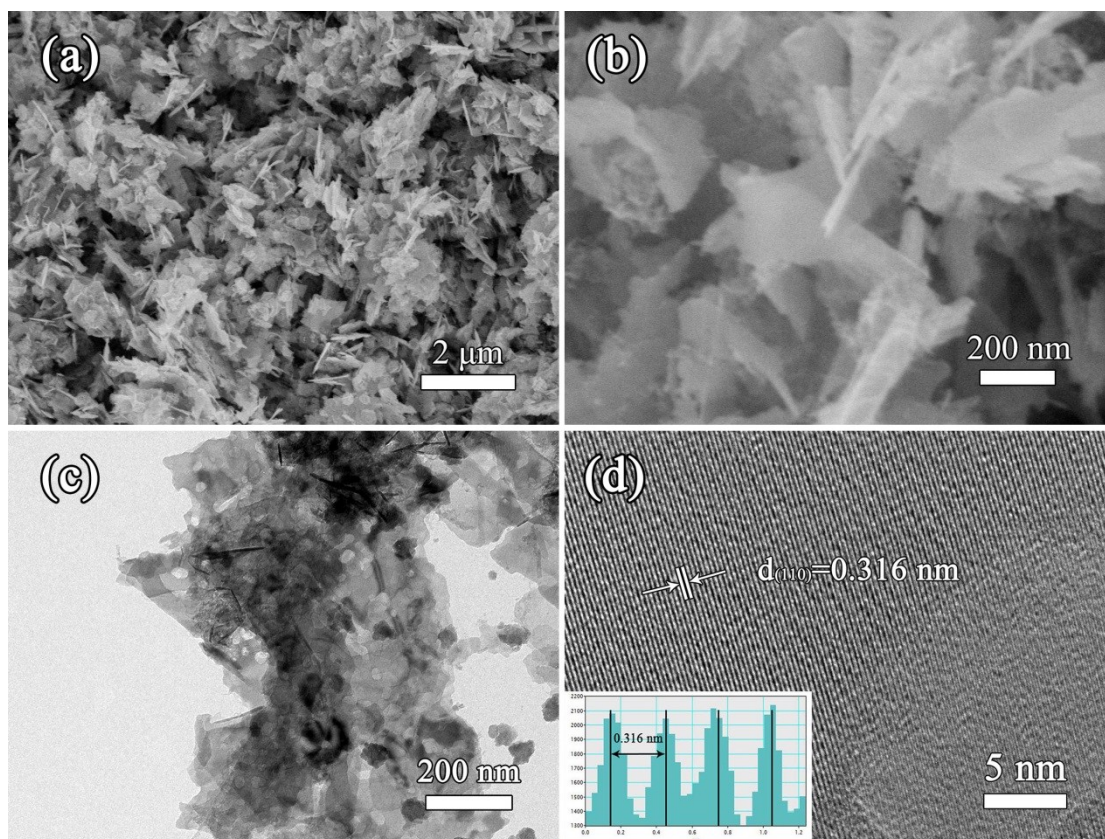

**Fig. S3.** (a, b) SEM images and (c,d) TEM images of bare  $V_3S_4$  nanosheets.

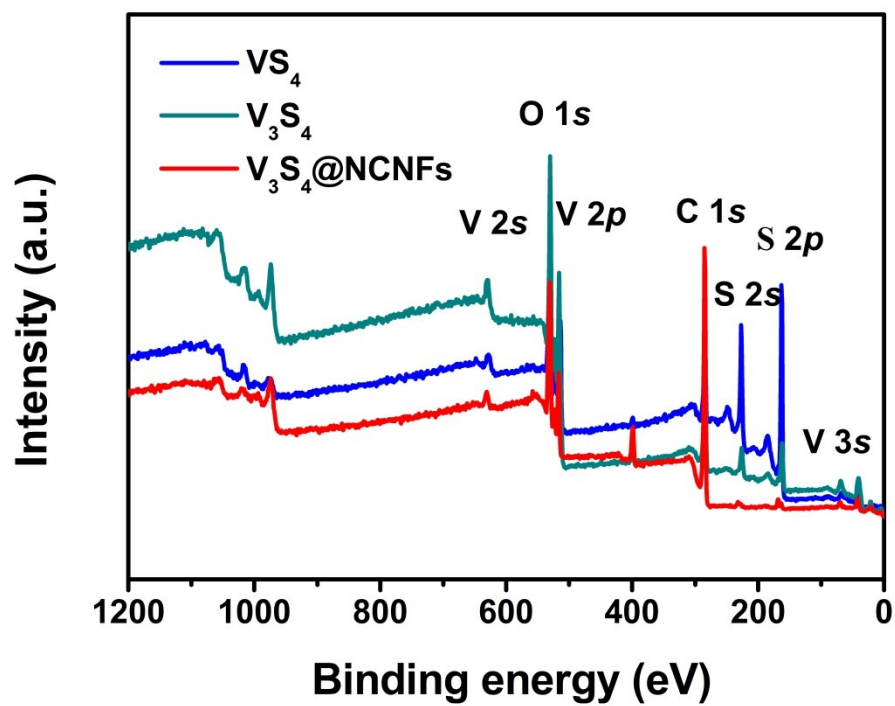

**Fig. S4.** XPS survey spectrum of  $VS_4$ , bare  $V_3S_4$ , and  $V_3S_4@NCNFs$  composites.

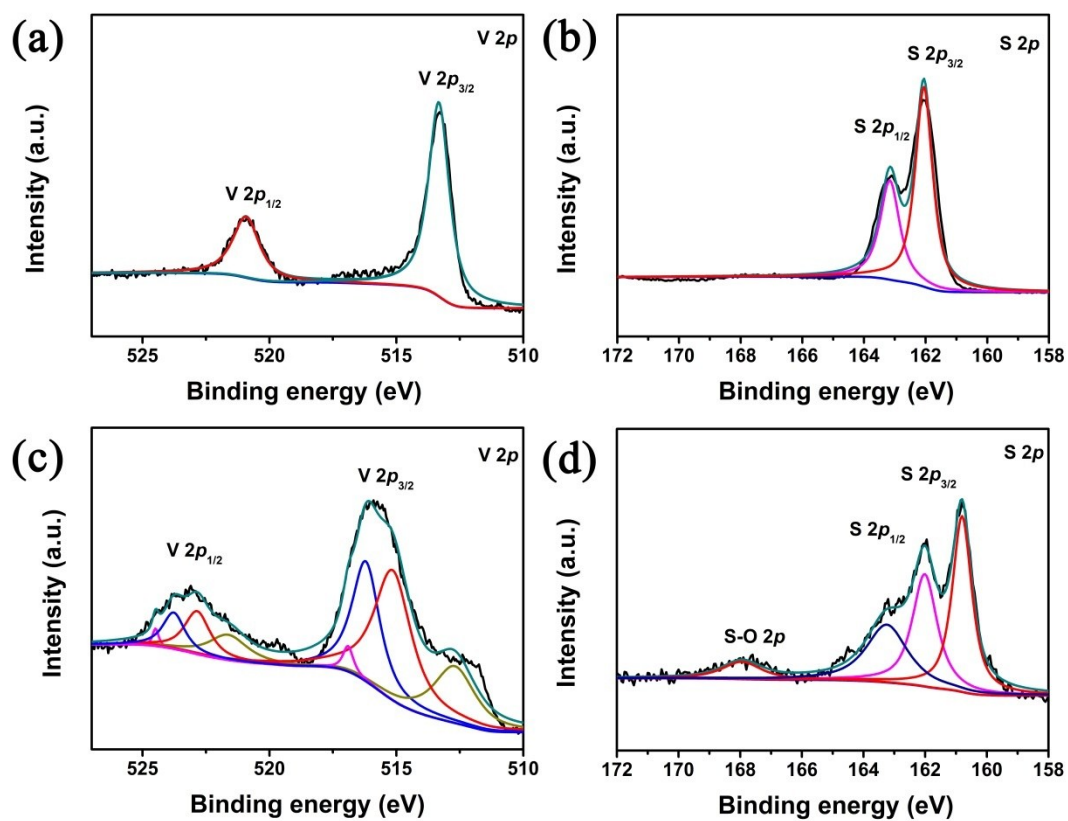

**Fig. S5.** The high-resolution XPS spectra of VS<sub>4</sub> (a, b), bare V<sub>3</sub>S<sub>4</sub> (c, d) with V 2p, S 2p, respectively.

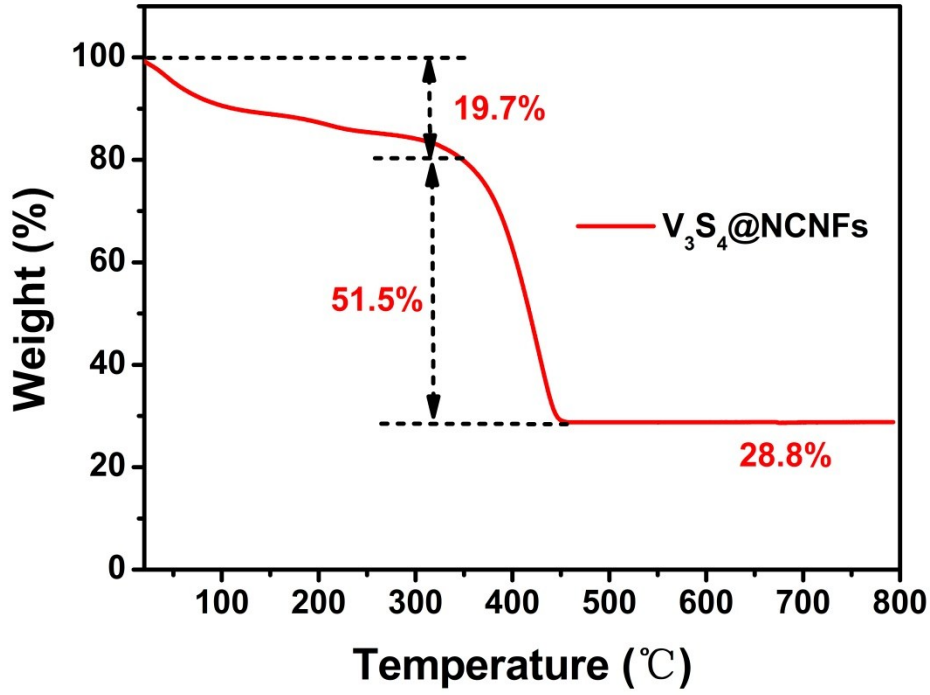

**Fig. S6.** TGA curves of  $V_3S_4@NCNFs$  sample in air from room temperature to 800 °C.

The initial mass loss below 350 °C is ascribed to the oxidation of  $V_3S_4$  into  $V_2O_5$  and the evaporation of water, and the distinct weight loss between 350 and 450 °C could be attributed to the carbon combustion with  $O_2$  into  $CO_2$ . The mass ratios of  $V_3S_4$  in these composites are calculated:

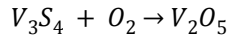

$$\begin{aligned}
 V_3S_4(\text{wt}\%) &= 100 \times \frac{2 \times M_{V_3S_4}}{2 \times M_{V_2O_5}} \times \frac{m_{V_2O_5}}{m_{V_3S_4@NCNFs}} \\
 &= 29.7\%
 \end{aligned}$$

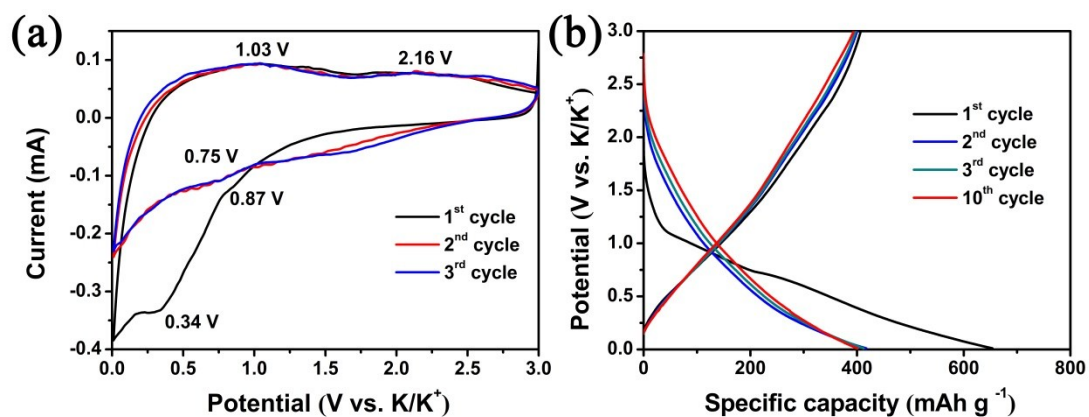

**Fig. S7.** (a) CV curves of  $V_3S_4@NCNFs$  electrode at a scan rate of  $0.2 \text{ mV s}^{-1}$  in the potential of 0.01–3.0 V (vs.  $K/K^+$ ). (b) Galvanostatic charge/discharge profiles of  $V_3S_4@NCNFs$  at a current density of  $0.2 \text{ A g}^{-1}$  for PIBs.

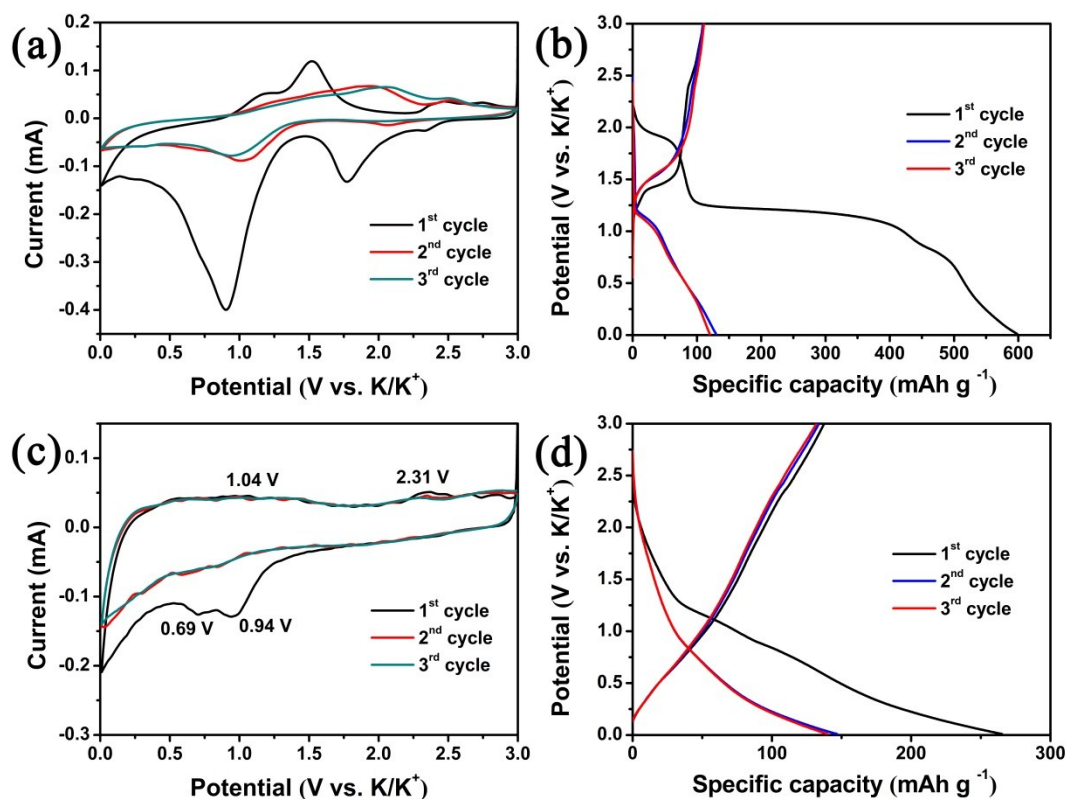

**Fig. S8.** The CV curves and Galvanostatic charge/discharge profiles of  $\text{VS}_4$  (a, b), bare  $\text{V}_3\text{S}_4$  (c, d), respectively.

The CV curve of  $\text{VS}_4$  quite disagree with that of  $\text{V}_3\text{S}_4@\text{NCNFs}$ , which have strong cathodic/anodic peaks, in matching with the charge-discharge plateaus of  $\text{VS}_4$ , which demonstrate its obvious diffusion behavior not pseudocapacitive behavior. Regrettably, there is a large area loss for the CV curves from the first to the second cycle, demonstrating the poor reversibility for  $\text{VS}_4$  as the anode in PIBs. The CV image of bare  $\text{V}_3\text{S}_4$  is similar to that of  $\text{V}_3\text{S}_4@\text{NCNFs}$ , which agrees with the charge-discharge weak plateaus of  $\text{V}_3\text{S}_4$ . However, in the subsequent cycle, the  $\text{V}_3\text{S}_4$  electrode shows the higher potentials of oxidation peaks and lower potentials of corresponding reduced peaks, indicating the large polarization for the potassium extraction/insertion process.<sup>1, 2</sup>

**Table S1.** Electrochemical performance comparison of vanadium-based and layered transition metal chalcogenides anode materials for PIBs.

| Materials                                | Cycling Performance                       |                           |                               | Rate performance                                      |                                                      | Reference        |
|------------------------------------------|-------------------------------------------|---------------------------|-------------------------------|-------------------------------------------------------|------------------------------------------------------|------------------|
|                                          | Discharge Capacity (mAh g <sup>-1</sup> ) | Cycles                    | Current (mA g <sup>-1</sup> ) | Discharge Capacity (mAh g <sup>-1</sup> )             | Current (A g <sup>-1</sup> )                         |                  |
| <b>V<sub>3</sub>S<sub>4</sub>@NCNFs</b>  | <b>447</b><br><b>245</b>                  | <b>300</b><br><b>1000</b> | <b>200</b><br><b>2000</b>     | <b>449, 410, 374, 346,</b><br><b>309, 249 and 202</b> | <b>0.1, 0.2, 0.5, 1.0,</b><br><b>2.0, 5.0 and 10</b> | <b>This work</b> |
| <b>VS<sub>2</sub> NSA</b>                | 410<br>360                                | 60<br>100                 | 100<br>500                    | 400, 380, 330,<br>250 and 100                         | 0.1, 0.2, 0.5, 1.0 and<br>2.0                        | 36               |
| <b>V<sub>5</sub>S<sub>8</sub>@C</b>      | 501<br>190                                | 100<br>1000               | 50<br>2000                    | 550, 474, 422,<br>360, 312, 274,<br>205 and 153       | 0.05, 0.1, 0.2, 0.5,<br>1.0, 2.0, 5.0 and<br>10      | 37               |
| <b>VSe<sub>2</sub></b>                   | 335                                       | 200                       | 200                           | 374, 350, 334,<br>269 and 172                         | 0.1, 0.2, 5, 1 and 2.0                               | 53               |
| <b>VN-QDS</b>                            | 228<br>215                                | 100<br>500                | 100<br>500                    | 261, 215, 187<br>and 152                              | 0.1, 0.5, 1 and 2.0                                  | 54               |
| <b>V<sub>2</sub>O<sub>3</sub>@PNCNFs</b> | 230                                       | 200                       | 50                            | 240, 221, 202, 186,<br>170 and 134                    | 0.05, 0.1, 0.2, 0.3,<br>0.5 and 1                    | 55               |
| <b>V<sub>2</sub>O<sub>3-x</sub>@rGO</b>  | 162<br>104                                | 500<br>2000               | 200<br>1000                   | 250, 210, 175, 160,<br>127 and 104                    | 0.025, 0.05, 0.1<br>0.2, 0.5 and 1.0                 | 56               |
| <b>MoS<sub>2</sub>/N-doped-C</b>         | 212<br>151                                | 200<br>1000               | 100<br>500                    | 258, 238, 204,<br>171 and 131                         | 0.1, 0.2, 0.5,<br>1 and 2                            | 38               |
| <b>MoS<sub>2</sub>@rGO</b>               | 416.7<br>424.6                            | 200<br>1000               | 100<br>500                    | 438.5, 364.8, 302.9,<br>253 and 196.8                 | 0.1, 0.2, 0.5,<br>1 and 2                            | 29               |
| <b>WS<sub>2</sub></b>                    | 102.8                                     | 100                       | 100                           | 109, 99, 86, 74,<br>68 and 62                         | 0.05, 0.1, 0.2, 0.4,<br>0.6 and 0.8                  | 39               |

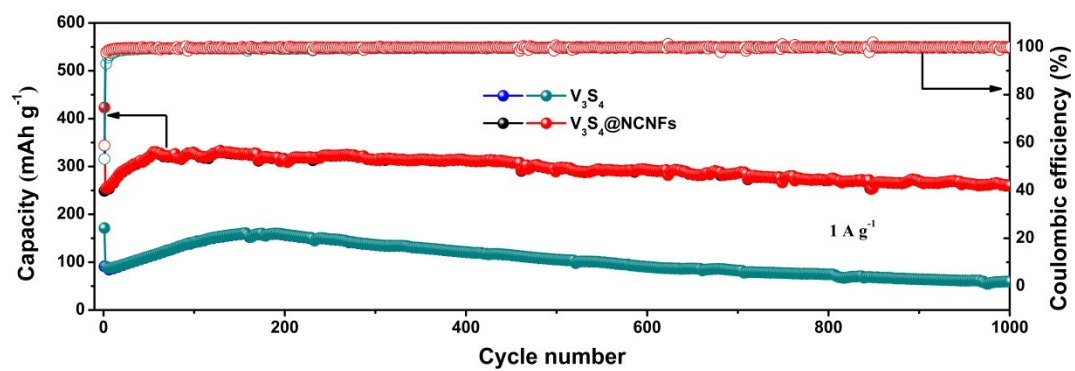

**Fig. S9.** Long-term cycling stability of the V<sub>3</sub>S<sub>4</sub>@NCNFs and V<sub>3</sub>S<sub>4</sub> electrodes at current densities of 1 A g<sup>-1</sup>.

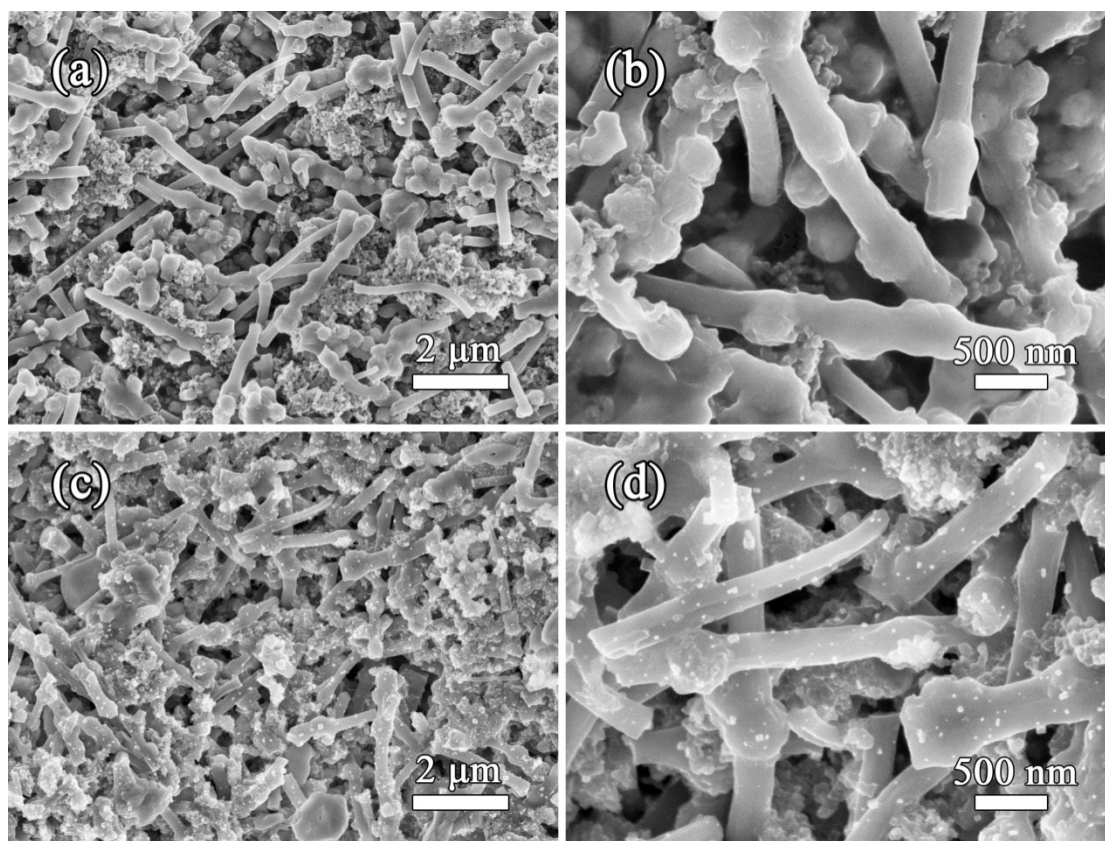

**Fig. S10.** Different magnifications SEM images of  $\text{V}_3\text{S}_4@\text{NCNFs}$  electrode before cycling (a, b) and after 300 cycles at 0.2 A g<sup>-1</sup>(c, d).

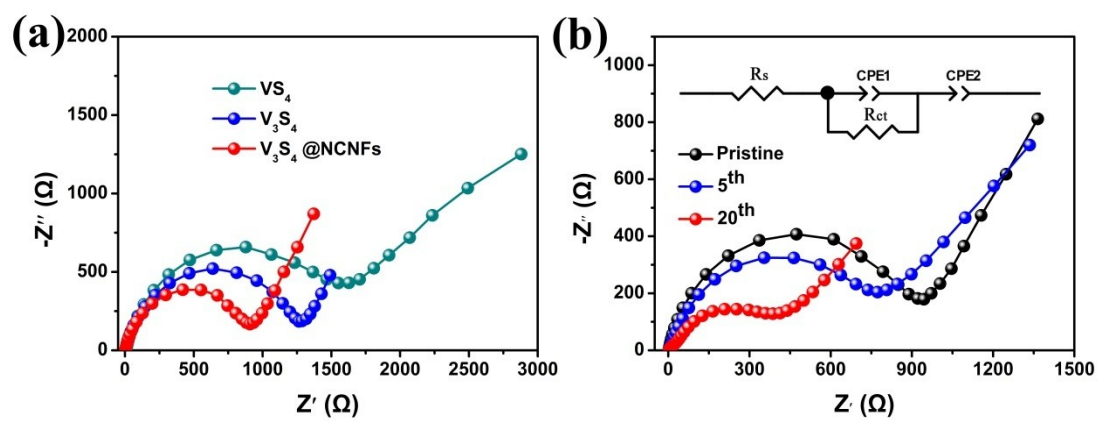

**Fig. S11.** (a) Nyquist plots of the  $VS_4$ , bare  $V_3S_4$ , and  $V_3S_4@NCNFs$  electrodes. (b) Nyquist plots of the  $V_3S_4@NCNFs$  electrodes after different cycles (inset: fitting equivalent circuit).

**Table S2.** The fitted results of hierarchical V<sub>3</sub>S<sub>4</sub>@NCNFs based on the equivalent circuit model.

| <b>sample</b>          | <b>R<sub>s</sub> (Ω)</b> | <b>R<sub>ct</sub> (Ω)</b> |
|------------------------|--------------------------|---------------------------|
| <b>Before cycling</b>  | 2.41                     | 888                       |
| <b>After 5 cycles</b>  | 2.43                     | 760                       |
| <b>After 20 cycles</b> | 2.08                     | 493                       |

## References

1. C. Mao, Y. Zhong, H. Shang, C. Li, Z. Guo and G. Li, *Chem. Eng. J.*, 2016, **304**, 511-517.
2. D. Zhang, Y. J. Mai, J. Y. Xiang, X. H. Xia, Y. Q. Qiao and J. P. Tu, *J. Power Sources.*, 2012, **217**, 229-235.
